# Supplementary material for: Transposons and pathogenicity inXanthomonas: acquisition of murein lytic transglycosylases by TnXax1enhancesXanthomonas citrisubsp.citri306 virulence and fitness
Source: PeerJ journal article supplement (doi:10.7717/peerj.6111), 2018-12-19
Supplement: FigureS4.pdf [file FigureS4.pdf]

# Biological Replicates

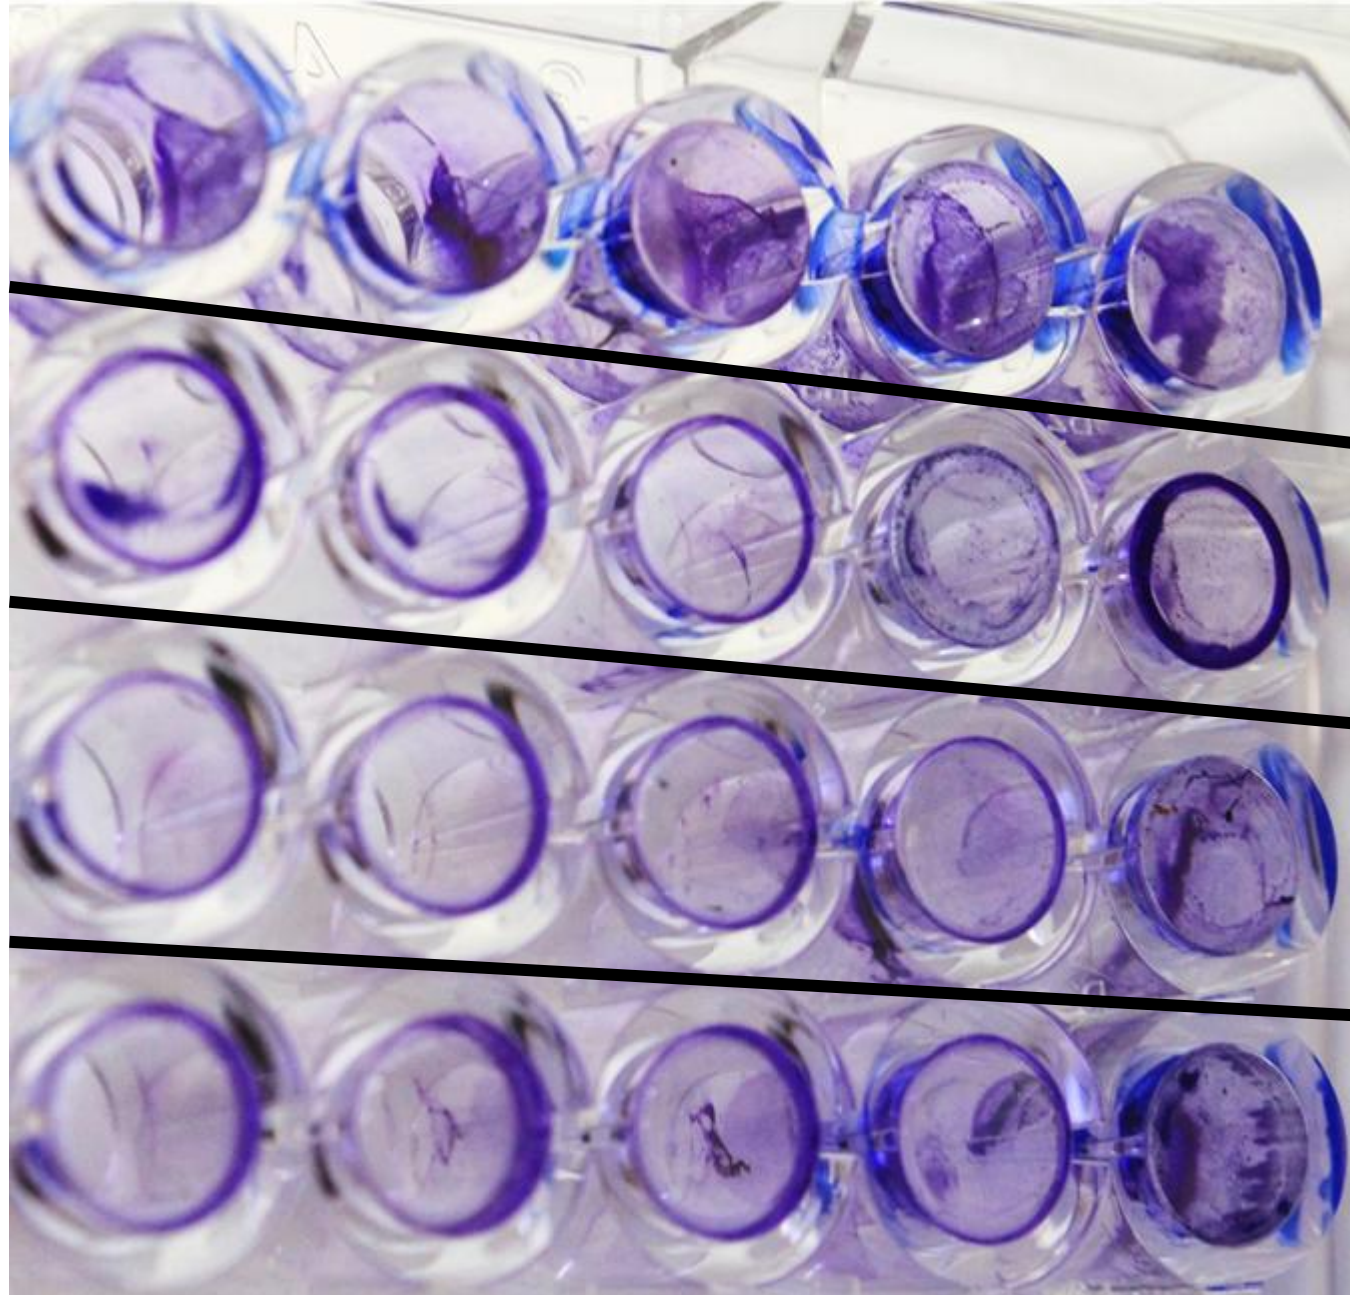

→ WT XccA

→  $\Delta mltB2.1$

→  $\Delta mltB2.2$

→  $\Delta mltB2.1-\Delta mltB2.2$
