# Supplementary material for: Transposons and pathogenicity in Xanthomonas: acquisition of murein lytic transglycosylases by TnXax1 enhances Xanthomonas citri subsp. citri 306 virulence and fitness
Source: PeerJ. 2018 Dec 19;6:e6111. doi: 10.7717/peerj.6111 (PMC6304161; doi:10.7717/peerj.6111)
Supplement: Supplemental Information 7 [file peerj-06-6111-s007.xlsx]

## Sheet: Plan1
Aggregation cell
Time	XccA1		Average	XccA2		Average	XccA3		Average	XccA4		Average	Average	Time	OD	STDEV
17	0.299	0.198	0.2485	0.254	0.196	0.225	0.154	0.143	0.1485	0.165	0.16	0.1625	0.196125	0	1	0.0417603
18	0.151	0.17	0.1605	0.145	0.158	0.1515	0.142	0.13	0.136	0.143	0.153	0.148	0.149	1	0.75972	0.00878208
19	0.181	0.138	0.1595	0.134	0.126	0.13	0.121	0.125	0.123	0.139	0.144	0.1415	0.1385	2	0.706182	0.0138067
20	0.177	0.101	0.139	0.133	0.157	0.145	0.12	0.122	0.121	0.131	0.133	0.132	0.13425	3	0.684512	0.00892679
21	0.147	0.126	0.1365	0.129	0.129	0.129	0.117	0.112	0.1145	0.134	0.13	0.132	0.128	5	0.652645	0.00823863
22	0.132	0.146	0.139	0.138	0.141	0.1395	0.12	0.12	0.12	0.12	0.131	0.1255	0.131	6	0.667941	0.00847791
23	0.136	0.108	0.122	0.123	0.156	0.1395	0.12	0.116	0.118	0.098	0.134	0.116	0.123875	7	0.631612	0.00927615
3	0.14	0.119	0.1295	0.1	0.13	0.115	0.107	0.104	0.1055	0.11	0.133	0.1215	0.117875	11	0.60102	0.00879897
7	0.101	0.113	0.107	0.105	0.122	0.1135	0.1	0.099	0.0995	0.11	0.094	0.102	0.1055	15	0.537922	0.00535023
11	0.104	0.081	0.0925	0.07	0.074	0.072	0.062	0.065	0.0635	0.068	0.071	0.0695	0.074375	19	0.379222	0.0109109
17	0.065	0.065	0.065	0.062	0.063	0.0625	0.053	0.043	0.048	0.063	0.069	0.066	0.060375	24	0.307839	0.00725754
Time	ΔmltB2.2 1		Average	ΔmltB2.2 2		Average	ΔmltB2.2 3		Average	ΔmltB2.2 4		Média	Average	Time	OD	STDEV
17	0.184	0.184	0.184	0.143	0.15	0.1465	0.15	0.147	0.1485	0.155	0.171	0.163	0.1605	0	1	0.0149875
18	0.188	0.172	0.18	0.146	0.145	0.1455	0.167	0.144	0.1555	0.149	0.152	0.1505	0.157875	1	0.983645	0.0132541
19	0.173	0.172	0.1725	0.137	0.139	0.138	0.14	0.139	0.1395	0.136	0.134	0.135	0.14625	2	0.911215	0.0152418
20	0.16	0.169	0.1645	0.13	0.13	0.13	0.135	0.138	0.1365	0.136	0.139	0.1375	0.142125	3	0.885514	0.0132353
21	0.157	0.154	0.1555	0.127	0.111	0.119	0.13	0.136	0.133	0.148	0.143	0.1455	0.13825	5	0.861371	0.0136771
22	0.155	0.159	0.157	0.12	0.111	0.1155	0.187	0.099	0.143	0.122	0.126	0.124	0.134875	6	0.840343	0.0161956
23	0.14	0.145	0.1425	0.153	0.135	0.144	0.134	0.12	0.127	0.139	0.103	0.121	0.133625	10	0.832555	0.00987025
3	0.153	0.105	0.129	0.107	0.145	0.126	0.157	0.134	0.1455	0.138	0.129	0.1335	0.1335	14	0.831776	0.00742462
7	0.101	0.125	0.113	0.093	0.042	0.0675	0.111	0.107	0.109	0.135	0.13	0.1325	0.1055	18	0.657321	0.0236722
11	0.038	0.057	0.0475	0.101	0.031	0.066	0.107	0.107	0.107	0.099	0.095	0.097	0.079375	22	0.494548	0.0238154
17	0.038	0.062	0.05	0.077	0.079	0.078	0.096	0.063	0.0795	0.089	0.045	0.067	0.068625	26	0.42757	0.0117865
Time	ΔmltB2.1-ΔmltB2.2 1		Average	ΔmltB2.1-ΔmltB2.2 2		Average	ΔmltB2.1-ΔmltB2.2 3		Average	ΔmltB2.1-ΔmltB2.2 4		Average	Average	Time	OD	STDEV
15	0.195	0.201	0.198	0.16	0.163	0.1615	0.175	0.173	0.174	0.196	0.196	0.196	0.182375	0	1	0.0152945
16	0.185	0.184	0.1845	0.15	0.161	0.1555	0.163	0.164	0.1635	0.187	0.189	0.188	0.172875	1	0.94791	0.0137267
17	0.181	0.179	0.18	0.15	0.149	0.1495	0.158	0.159	0.1585	0.173	0.188	0.1805	0.167125	2	0.916381	0.0135064
18	0.161	0.169	0.165	0.148	0.147	0.1475	0.156	0.172	0.164	0.163	0.181	0.172	0.162125	3	0.888965	0.00898871
19	0.165	0.174	0.1695	0.133	0.128	0.1305	0.156	0.154	0.155	0.174	0.169	0.1715	0.156625	5	0.858807	0.0163721
20	0.15	0.163	0.1565	0.153	0.136	0.1445	0.148	0.145	0.1465	0.159	0.16	0.1595	0.15175	6	0.832077	0.00637868
21	0.101	0.151	0.126	0.136	0.145	0.1405	0.15	0.146	0.148	0.152	0.144	0.148	0.140625	10	0.771076	0.00898175
2	0.106	0.134	0.12	0.139	0.133	0.136	0.126	0.145	0.1355	0.135	0.083	0.109	0.125125	14	0.686086	0.0113158
6	0.122	0.125	0.1235	0.133	0.137	0.135	0.13	0.114	0.122	0.141	0.098	0.109	0.122375	18	0.671008	0.00921531
10	0.127	0.127	0.127	0.076	0.11	0.093	0.074	0.102	0.088	0.152	0.113	0.1195	0.106875	22	0.586018	0.0166822
15	0.096	0.07	0.083	0.073	0.083	0.078	0.056	0.049	0.0525	0.07	0.09	0.08	0.073375	26	0.40233	0.0121829
Time	ΔmltB2.1 1		Average	ΔmltB2.1 2		Average	ΔmltB2.1 3		Average	ΔmltB2.1 4		Average	Average	Time	OD	STDEV
15	0.165	0.164	0.1645	0.182	0.167	0.1745	0.161	0.163	0.162	0.183	0.186	0.1845	0.171375	0	1	0.00890488
16	0.149	0.153	0.151	0.168	0.172	0.17	0.148	0.148	0.148	0.165	0.168	0.1665	0.158875	1	0.927061	0.00951561
17	0.165	0.168	0.1665	0.168	0.158	0.163	0.145	0.149	0.147	0.146	0.157	0.1515	0.157	2	0.91612	0.00800781
18	0.144	0.144	0.144	0.178	0.16	0.169	0.157	0.136	0.1465	0.157	0.164	0.1605	0.155	3	0.904449	0.0102408
19	0.141	0.143	0.142	0.153	0.158	0.1555	0.142	0.14	0.141	0.159	0.159	0.159	0.149375	5	0.871627	0.00797947
20	0.131	0.143	0.137	0.15	0.144	0.147	0.135	0.152	0.1435	0.15	0.153	0.1515	0.14475	6	0.844639	0.00529741
21	0.147	0.14	0.1435	0.144	0.13	0.137	0.133	0.14	0.1365	0.151	0.152	0.1515	0.142125	10	0.829322	0.00607634
2	0.124	0.129	0.1265	0.151	0.115	0.133	0.134	0.129	0.1315	0.123	0.158	0.1405	0.132875	14	0.775346	0.00501716
6	0.104	0.117	0.1105	0.123	0.136	0.1295	0.121	0.119	0.12	0.117	0.129	0.123	0.12075	18	0.704595	0.00684197
10	0.1	0.077	0.0885	0.063	0.07	0.0665	0.071	0.086	0.0785	0.075	0.081	0.078	0.077875	22	0.454413	0.00778922
15	0.082	0.066	0.074	0.062	0.057	0.0595	0.049	0.076	0.0625	0.079	0.07	0.0745	0.067625	26	0.394602	0.0067117
