# Supplementary material for: Transposons and pathogenicity in Xanthomonas: acquisition of murein lytic transglycosylases by TnXax1 enhances Xanthomonas citri subsp. citri 306 virulence and fitness
Source: PeerJ. 2018 Dec 19;6:e6111. doi: 10.7717/peerj.6111 (PMC6304161; doi:10.7717/peerj.6111)
Supplement: Supplemental Information 9 [file peerj-06-6111-s009.xlsx]

## Sheet: ΔmltB2.1-ΔmltB2.2
Days posto inoculation	ΔmltB2.1-ΔmltB2.2
DPI 0 - 21/11	Plant1								Plant2								Plant3
	Replicate	Technical replicate							Replicate	Technical replicate							Replicate	Technical replicate
		Dilution-1	mL	no cm2	Log 10	STDDEV	Error			Dilution -1	mL	no cm2	Log 10	STDDEV	Error			Dilution -1	mL	no cm2	Log 10	STDDEV	Error
	1	17	17000	29750	4.47349	0.209011	0.104506		1	20	20000	35000	4.54407	0.376981	0.18849		1	9	9000	15750	4.19728	0.823767	0.411883
	2	50	50000	87500	4.94201				2	6	6000	10500	4.02119				2	18	360	630	2.79934
	3	20	20000	35000	4.54407				3	15	15000	26250	4.41913				3	27	540	945	2.97543
	4	22	22000	38500	4.58546				4	3	3000	5250	3.72016				4	5	100	175	2.24304
	x		0	0	4.63626				x	11	220	385	4.17614				x	14.75	295	516.25	3.05377
DPI 1 - 22/11	Plant1									Plant2									Plant3
	Replicate	Technical replicate								Replicate	Technical replicate								Replicate	Technical replicate
		Dilution -2		mL	no cm2	Log 10	STDDEV	Error			Dilution -2		mL	no cm2	Log 10	STDDEV	Error			Dilution -2		mL	no cm2	Log 10	STDDEV	Error
	1	6		60000	105000	5.02119	0.298979	0.14949		1	16		160000	280000	5.44716	0.173189	0.0865945		1	13		130000	227500	5.35698	0.200633	0.100316
	2	3		30000	52500	4.72016				2	13		130000	227500	5.35698				2	5		50000	87500	4.94201
	3	16		160000	280000	5.44716				3	29		290000	507500	5.70544				3	6		60000	105000	5.02119
	4	6		60000	105000	5.02119				4	12		120000	210000	5.32222				4	11		110000	192500	5.28443
	x			0	0	5.05242				x	17.5		350	612.5	5.45795				x	8.75		175	306.25	5.15115
DPI 3 - 24/11	Plant1									Plant2									Plant3
	Replicate	Technical replicate								Replicate	Technical replicate								Replicate	Technical replicate
		Dilution -4		mL	no cm2	Log 10	STDDEV	Error			Dilution -4		mL	no cm2	Log 10	STDDEV	Error			Dilution -4		mL	no cm2	Log 10	STDDEV	Error
	1	17		17000000	29750000	7.47349	0.314965	0.157482		1	53		53000000	92750000	7.96731	0.306285	0.153143		1	79		79000000	138250000	8.14067	0.186417	0.0932087
	2	14		14000000	24500000	7.38917				2	29		29000000	50750000	7.70544				2	34		34000000	59500000	7.77452
	3	6		6000000	10500000	7.02119				3	25		25000000	43750000	7.64098				3	39		39000000	68250000	7.8341
	4	35		35000000	61250000	7.78711				4	118		118000000	206500000	8.31492				4	73		73000000	127750000	8.10636
	x			0	0	7.41774				x	56.25		112500	196875	7.90716				x	56.25		112500	196875	7.96391
DPI 6 - 27/11	Plant1								Plant2								Plant3
	Replicate	Technical replicate							Replicate	Technical replicate							Replicate	Technical replicate
		Dilution -7	mL	no cm2	Log 10	STDDEV	Error			Dilution -7	mL	no cm2	Log 10	STDDEV	Error			Dilution -7	mL	no cm2	Log 10	STDDEV	Error
	1	6	6000000000	10500000000	10.0212	0.488813	0.244407		1	3	3000000000	5250000000	9.72016	0.59178	0.29589		1	37	37000000000	64750000000	10.8112	0.117037	0.0585187
	2	53	53000000000	92750000000	10.9673				2	16	16000000000	28000000000	10.4472				2	65	65000000000	113750000000	11.056
	3	77	77000000000	134750000000	11.1295				3	12	12000000000	21000000000	10.3222				3	59	59000000000	103250000000	11.0139
	4	28	28000000000	49000000000	10.6902				4	83	83000000000	145250000000	11.1621				4	65	65000000000	113750000000	11.056
	x		0		10.7021				x	28.5	28500000000	49875000000	10.4129				x	63	63000000000	110250000000	10.9843
DPI 10 - 1/12	Plant1									Plant2									Plant3
	Replicate	Technical replicate								Replicate	Technical replicate								Replicate	Technical replicate
		Dilution -7		mL	no cm2	Log 10	STDDEV	Error			Dilution -7		mL	no cm2	Log 10	STDDEV	Error			Dilution -7		mL	no cm2	Log 10	STDDEV	Error
	1	11		11000000000	19250000000	10.2844	0.0537405	0.0268702		1	3		3000000000	5250000000	9.72016	0.349804	0.174902		1	8		8000000000	14000000000	10.1461	0.431618	0.215809
	2	10		10000000000	17500000000	10.243				2	7		7000000000	12250000000	10.0881				2	3		3000000000	5250000000	9.72016
	3	13		13000000000	22750000000	10.357				3	6		6000000000	10500000000	10.0212				3	6		6000000000	10500000000	10.0212
	4	10		10000000000	17500000000	10.243				4	21		21000000000	36750000000	10.5653				4	32		32000000000	56000000000	10.7482
	x					10.2819				x	9.25		9250000000	16187500000	10.0987				x	12.25		12250000000	21437500000	10.1589
DPI 15 - 15/08	Plant1									Plant2									Plant3
	Replicate	Technical replicate								Replicate	Technical replicate								Replicate	Technical replicate
		Dilution -6		mL	no cm2	Log 10	STDDEV	Error			Dilution -6		mL	no cm2	Log 10	STDDEV	Error			Dilution -6		mL	no cm2	Log 10	STDDEV	Error
	1	7		700000000	1225000000	9.08814	0.158833	0.0794166		1	1		100000000	175000000	8.24304	4.12152	2.06076		1	17		1700000000	2975000000	9.47349	0.618858	0.309429
	2	8		800000000	1400000000	9.14613				2	1		100000000	175000000	8.24304				2	1		100000000	175000000	8.24304
	3	4		400000000	700000000	8.8451				3	1		100000000	175000000	8.24304				3	5		500000000	875000000	8.94201
	4	4		400000000	700000000	8.8451				4	0		0	0	0				4	23		2300000000	4025000000	9.60477
	x			0		8.98112				x	0.75		75000000	131250000	6.18228				x	11.5		1150000000	2012500000	9.06582
							ok

## Sheet: ΔmltB2.2
Days Post inoculation	MltB2.2
DPI 0 - 21/11	Plant 1									Plant 2									Plant 3
	Replicate	Technical replicate								Replicate	Technical replicate								Replicate	Technical replicate
		Concentrate		mL	no cm2	Log10	STDDEV	Error			Concentrate		mL	no cm2	Log10	STDDEV	Error			Concentrate		mL	no cm2	Log10	STDDEV	Error
	1	41		4100	7175	3.85582	0.0753904	0.0376952		1	39		3900	6825	3.8341	0.161671	0.0808353		1	59		5900	10325	4.01389	0.0887603	0.0443802
	2	31		3100	5425	3.7344				2	21		2100	3675	3.56526				2	61		6100	10675	4.02837
	3	46		4600	8050	3.9058				3	42		4200	7350	3.86629				3	39		3900	6825	3.8341
	4	35		3500	6125	3.78711				4	49		4900	8575	3.93323				4	50		5000	8750	3.94201
	Average	38.25		765	1338.75	3.82078				Average	37.75		755	1321.25	3.79972				Average	52.25		1045	1828.75	3.95459
DPI 1 - 22/11	Plant 1									Plant 2									Plant 3
	Replicate	Technical replicate								Replicate	Technical replicate								Replicate	Technical replicate
		Dilution -1		mL	no cm2	Log10	STDDEV	Error			Dilution -1		mL	no cm2	Log10	STDDEV	Error			Dilution -1		mL	no cm2	Log10	STDDEV	Error
	1	15		15000	26250	4.41913	0.0639352	0.0319676		1	53		53000	92750	4.96731	0.0854866	0.0427433		1	9		9000	15750	4.19728	0.347907	0.173954
	2	11		11000	19250	4.28443				2	35		35000	61250	4.78711				2	51		51000	89250	4.95061
	3	15		15000	26250	4.41913				3	35		35000	61250	4.78711				3	45		45000	78750	4.89625
	4	14		14000	24500	4.38917				4	42		42000	73500	4.86629				4	21		21000	36750	4.56526
	Average	13.75		13750	24062.5	4.37796				Average	41.25		41250	72187.5	4.85195				Average	31.5		31500	55125	4.65235
DPI 3 - 24/11	Plant 1									Plant 2									Plant 3
	Replicate	Technical replicate								Replicate	Technical replicate								Replicate	Technical replicate
		Dilution -4		mL	no cm2	Log10	STDDEV	Error			Dilution -4		mL	no cm2	Log10	STDDEV	Error			Dilution -4		mL	no cm2	Log10	STDDEV	Error
	1	28		28000000	49000000	7.6902	0.236095	0.118048		1	33		33000000	57750000	7.76155	0.168631	0.0843157		1	16		16000000	28000000	7.44716	0.296791	0.148395
	2	10		10000000	17500000	7.24304				2	72		72000000	126000000	8.10037				2	11		11000000	19250000	7.28443
	3	10		10000000	17500000	7.24304				3	77		77000000	134750000	8.12953				3	18		18000000	31500000	7.49831
	4	23		23000000	40250000	7.60477				4	51		51000000	89250000	7.95061				4	4		4000000	7000000	6.8451
	Average	17.75		35500	62125	7.44526				Average	58.25		116500	203875	7.98551				Average	12.25		12250000	21437500	7.26875
DPI 6 - 27/11	Plant 1									Plant 2									Plant 3
	Replicate	Technical replicate								Replicate	Technical replicate								Replicate	Technical replicate
		Dilution -7	mL	no cm2	Log10	STDDEV	Error				Dilution -7	mL	no cm2	Log10	STDDEV	Error				Dilution -7	mL	no cm2	Log10	STDDEV	Error
	1	25	25000000000	43750000000	10.641	0.39441	0.197205			1	61	61000000000	106750000000	11.0284	0.130472	0.065236			1	4	4000000000	7000000000	9.8451	#NAME?	#NAME?
	2	6	6000000000	10500000000	10.0212					2	55	55000000000	96250000000	10.9834					2	3	3000000000	5250000000	9.72016
	3	5	5000000000	8750000000	9.94201					3	91	91000000000	159250000000	11.2021					3	3	3000000000	5250000000	9.72016
	4	3	3000000000	5250000000	9.72016					4	102	102000000000	178500000000	11.2516					4	5	5000000000	8750000000	9.94201
	Average	9.75	9750000000	17062500000	10.0811					Average	77.25	77250000000	135187500000	11.1164					Average	3.75	3750000000	6562500000	#NAME?
DPI 10 - 1/12	Plant 1								Plant 2								Plant 3
	Replicate	Technical replicate							Replicate	Technical replicate							Replicate	Technical replicate
		Dilution -6	mL	no cm2	Log10	STDDEV	Error			Dilution -6	mL	no cm2	Log10	STDDEV	Error			Dilution -6	mL	no cm2	Log10	STDDEV	Error
	1	10	1000000000	1750000000	9.24304	0.127781	0.0638904		1	83	8300000000	14525000000	10.1621	0.263514	0.131757		1	2	200000000	350000000	8.54407	0.575588	0.287794
	2	6	600000000	1050000000	9.02119				2	47	4700000000	8225000000	9.91514				2	11	1100000000	1925000000	9.28443
	3	5	500000000	875000000	8.94201				3	21	2100000000	3675000000	9.56526				3	23	2300000000	4025000000	9.60477
	4	7	700000000	1225000000	9.08814				4	68	6800000000	11900000000	10.0755				4	43	4300000000	7525000000	9.87651
	Average	7	700000000	1225000000	9.07359				Average	54.75	5475000000	9581250000	9.92951				Average	19.75	1975000000	3456250000	9.32744
DPI 15 - 21/08	Plant 1								Plant 2								Plant 3
	Replicate	Technical replicate							Replicate	Technical replicate							Replicate	Technical replicate
		Dilution -6	mL	no cm2	Log10	STDDEV	Error			Dilution -6	mL	no cm2	Log10	STDDEV	Error			Dilution -6	mL	no cm2	Log10	STDDEV	Error
	1	1	100000000	175000000	8.24304	0.331249	0.165625		1	3	300000000	525000000	8.72016	4.4235	2.21175		1	7	700000000	1225000000	9.08814	0.317467	0.158734
	2	2	200000000	350000000	8.54407				2	15	1500000000	2625000000	9.41913				2	6	600000000	1050000000	9.02119
	3	1	100000000	175000000	8.24304				3	1	100000000	175000000	8.24304				3	13	1300000000	2275000000	9.35698
	4	5	500000000	875000000	8.94201				4	0	0	0	0				4	30	3000000000	5250000000	9.72016
	Average	2.25	225000000	393750000	8.49304				Average	4.75	475000000	831250000	6.59558				Average	14	1400000000	2450000000	9.29662

## Sheet: XccA
Days Post Inoculation	XccA WT
DPI 0 - 21/11	Plant 1									Plant 2									Plant 3
	Replicate	Technical replicate								Replicate	Technical replicate								Replicate	Technical replicate
		Dilution -1		mL	no cm2	Log 10	STDDEV	Error			Dilution -1		mL	no cm2	Log 10	STDDEV	Error			Dilution -1		mL	no cm2	Log 10	STDDEV	Error
	1	24		24000	42000	4.62325	0.179186	0.0895928		1	8		8000	14000	4.14613	0.188844	0.0944221		1	18		18000	31500	4.49831	0.160858	0.080429
	2	9		9000	15750	4.19728				2	12		12000	21000	4.32222				2	9		9000	15750	4.19728
	3	13		13000	22750	4.35698				3	8		8000	14000	4.14613				3	8		8000	14000	4.14613
	4	12		12000	21000	4.32222				4	20		20000	35000	4.54407				4	9		9000	15750	4.19728
	x	14.5		290	507.5	4.37493				x	12		240	420	4.28964				x	11		220	385	4.25975
DPI 1 - 22/11	Plant 1									Plant 2									Plant 3
	Replicate	Technical replicate								Replicate	Technical replicate								Replicate	Technical replicate
		Dilution -1		mL	no cm2	Log 10	STDDEV	Error			Dilution -1		mL	no cm2	Log 10	STDDEV	Error			Dilution -1		mL	no cm2	Log 10	STDDEV	Error
	1	39		39000	68250	4.8341	0.0761173	0.0380587		1	24		24000	42000	4.62325	0.170857	0.0854285		1	43		43000	75250	4.87651	0.170204	0.0851018
	2	46		46000	80500	4.9058				2	25		25000	43750	4.64098				2	42		42000	73500	4.86629
	3	57		57000	99750	4.99891				3	29		29000	50750	4.70544				3	51		51000	89250	4.95061
	4	55		55000	96250	4.9834				4	12		12000	21000	4.32222				4	97		97000	169750	5.22981
	x	49.25		985	1723.75	4.93055				x	22.5		450	787.5	4.57297				x	58.25		1165	2038.75	4.9808
DPI 3 - 24/11	Plant 1									Plant 2									Plant 3
	Replicate	Technical replicate								Replicate	Technical replicate								Replicate	Technical replicate
		Dilution -4		mL	no cm2	Log 10	STDDEV	Error			Dilution -4		mL	no cm2	Log 10	STDDEV	Error			Dilution -4		mL	no cm2	Log 10	STDDEV	Error
	1	29		29000000	50750000	7.70544	0.13381	0.0669048		1	25		25000000	43750000	7.64098	0.135338	0.0676689		1	40		40000000	70000000	7.8451	0.2844	0.1422
	2	24		24000000	42000000	7.62325				2	29		29000000	50750000	7.70544				2	52		52000000	91000000	7.95904
	3	35		35000000	61250000	7.78711				3	22		22000000	38500000	7.58546				3	74		74000000	129500000	8.11227
	4	17		17000000	29750000	7.47349				4	45		45000000	78750000	7.89625				4	16		16000000	28000000	7.44716
	x	26.25		52500	91875	7.64732				x	30.25		60500	105875	7.70703				x	45.5		91000	159250	7.84089
DPI 6 - 27/11	Plant 1								Plant 2								Plant 3
	Replicate	Technical replicate							Replicate	Technical replicate							Replicate	Technical replicate
		Dilution -7	mL	no cm2	Log 10	STDDEV	Error			Dilution -7	mL	no cm2	Log 10	STDDEV	Error			Dilution -7	mL	no cm2	Log 10	STDDEV	Error
	1	10	10000000000	17500000000	10.243	0.233525	0.116762		1	30	30000000000	52500000000	10.7202	0.5118	0.2559		1	14	14000000000	24500000000	10.3892	0.388128	0.194064
	2	7	7000000000	12250000000	10.0881				2	160	160000000000	280000000000	11.4472				2	20	20000000000	35000000000	10.5441
	3	20	20000000000	35000000000	10.5441				3	20	20000000000	35000000000	10.5441				3	43	43000000000	75250000000	10.8765
	4	21	21000000000	36750000000	10.5653				4	10	10000000000	17500000000	10.243				4	5	5000000000	8750000000	9.94201
	x	14.5	14500000000	25375000000	10.3601				x	55	55000000000	96250000000	10.7386				x	20.5	20500000000	35875000000	10.4379
DPI10 - 01/12	Plant 1								Plant 2								Plant 3
	Replicate	Technical replicate							Replicate	Technical replicate							Replicate	Technical replicate
		Dilution -6	mL	no cm2	Log 10	STDDEV	Error			Dilution -6	mL	no cm2	Log 10	STDDEV	Error			Dilution -6	mL	no cm2	Log 10	STDDEV	Error
	1	30	3000000000	5250000000	9.72016	0.22514	0.11257		1	24	2400000000	4200000000	9.62325	0.290463	0.145232		1	19	1900000000	3325000000	9.52179	0.306085	0.153043
	2	60	6000000000	10500000000	10.0212				2	54	5400000000	9450000000	9.97543				2	39	3900000000	6825000000	9.8341
	3	90	9000000000	15750000000	10.1973				3	99	9900000000	17325000000	10.2387				3	100	10000000000	17500000000	10.243
	4	33	3300000000	5775000000	9.76155				4	98	9800000000	17150000000	10.2343				4	29	2900000000	5075000000	9.70544
	x	53.25	5325000000	9318750000	9.92505				x	68.75	6875000000	12031250000	10.0179				x	46.75	4675000000	8181250000	9.82609
																			0
DPI 15 - 21/08	Plant 1								Plant 2								Plant 3
	Replicate	Technical replicate							Replicate	Technical replicate							Replicate	Technical replicate
		Dilution -6	mL	no cm2	Log 10	STDDEV	Error			Dilution -6	mL	no cm2	Log 10	STDDEV	Error			Dilution -6	mL	no cm2	Log 10	STDDEV	Error
	1	3	300000000	525000000	8.72016	0.235856	0.117928		1	2	200000000	350000000	8.54407	0.505785	0.252893		1	18	1800000000	3150000000	9.49831	0.512676	0.256338
	2	2	200000000	350000000	8.54407				2	8	800000000	1400000000	9.14613				2	4	400000000	700000000	8.8451
	3	1	100000000	175000000	8.24304				3	12	1200000000	2100000000	9.32222				3	1	100000000	175000000	8.24304
	4	1	100000000	175000000	8.24304				4	1	100000000	175000000	8.24304				4	4	400000000	700000000	8.8451
	x	1.75	175000000	306250000	8.43758				x	5.75	575000000	1006250000	8.81386				x	6.75	675000000	1181250000	8.85789

## Sheet: ΔmltB2.1
Days Post Inoculation	MltB2.1
DPI 0 - 29/11	Plant 1								Plant 2								Plant 3
	Replicate	Technical replicate							Replicate	Technical replicate							Replicate	Technical replicate
		Dilution-1	mL	no cm2	Log 10	STDDEV	Error			Dilution -1	mL	no cm2	Log 10	STDDEV	Error			Dilution -1	mL	no cm2	Log 10	STDDEV	Error
	1	63	63000	110250	5.04238	0.176036	0.0880179		1	57	57000	99750	4.99891	0.118091	0.0590457		1	21	21000	36750	4.56526	0.203061	0.10153
	2	37	37000	64750	4.81124				2	36	36000	63000	4.79934				2	37	37000	64750	4.81124
	3	46	46000	80500	4.9058				3	67	67000	117250	5.06911				3	46	46000	80500	4.9058
	4	24	24000	42000	4.62325				4	45	45000	78750	4.89625				4	17	17000	29750	4.47349
	Average	42.5	42500	74375	4.84567				Average	51.25	51250	89687.5	4.9409				Average	30.25	30250	52937.5	4.68894
DPI 1 - 30/11	Plant 1									Plant 2									Plant 3
	Replicate	Technical replicate								Replicate	Technical replicate								Replicate	Technical replicate
		Dilution -2		mL	no cm2	Log 10	STDDEV	Error			Dilution -2		mL	no cm2	Log 10	STDDEV	Error			Dilution-2		mL	no cm2	Log 10	STDDEV	Erro
	1	51		510000	892500	5.95061	0.324479	0.162239		1	30		300000	525000	5.72016	0.192783	0.0963915		1	18		180000	315000	5.49831	0.303321	0.15166
	2	51		510000	892500	5.95061				2	16		160000	280000	5.44716				2	45		450000	787500	5.89625
	3	11		110000	192500	5.28443				3	47		470000	822500	5.91514				3	99		990000	1732500	6.23867
	Average	21		210000	367500	5.56526				4	26		260000	455000	5.65801				4	39		390000	682500	5.8341
	x	33.5		335000	586250	5.68773				Average	29.75		297500	520625	5.68512				Average	50.25		502500	879375	5.86683
DPI 3 - 2/12	Plant 1									Plant 2									Plant 3
	Replicate	Technical replicate								Replicate	Technical replicate								Replicate	Technical replicate
		Dilution -4		mL	no cm2	Log 10	STDDEV	Error			Dilution 1:100		mL	no cm2	Log 10	STDDEV	Error			Dilution -4		mL	no cm2	Log 10	STDDEV	Error
	1	21		21000000	36750000	7.56526	0.5701	0.28505		1	7		7000000	12250000	7.08814	0.157615	0.0788076		1	13		13000000	22750000	7.35698	0.46391	0.231955
	2	9		9000000	15750000	7.19728				2	7		7000000	12250000	7.08814				2	54		54000000	94500000	7.97543
	3	10		10000000	17500000	7.24304				3	15		15000000	26250000	7.41913				3	4		4000000	7000000	6.8451
	4	1		1000000	1750000	6.24304				4	10		10000000	17500000	7.24304				4	17		17000000	29750000	7.47349
	Average	10.25		10250000	17937500	7.06215				Average	9.75		9750000	17062500	7.20961				Average	22		22000000	38500000	7.41275
DPI 6 - 5/12	Plant 1								Plant 2								Plant 3
	Replicate	Technical replicate							Replicate	Technical replicate							Replicate	Technical replicate
		Dilution -6	mL	no cm2	Log 10	STDDEV	Error			Dilution -6	mL	no cm2	Log 10	STDDEV	Error			Dilution -6	mL	no cm2	Log 10	STDDEV	Error
	1	2	200000000	350000000	8.54407	0.351381	0.175691		1	2	200000000	350000000	8.54407	0.288214	0.144107		1	8	800000000	1400000000	9.14613	0.3611	0.18055
	2	2	200000000	350000000	8.54407				2	4	400000000	700000000	8.8451				2	41	4100000000	7175000000	9.85582
	3	6	600000000	1050000000	9.02119				3	1	100000000	175000000	8.24304				3	33	3300000000	5775000000	9.76155
	4	10	1000000000	1750000000	9.24304				4	1	100000000	175000000	8.24304				4	50	5000000000	8750000000	9.94201
	Average	5	500000000	875000000	8.83809				Average	2	200000000	350000000	8.46881				Average	33	3300000000	5775000000	9.67638
DPI 10 - 10/08	Plant 1									Plant 2									Plant 3
	Replicate	Technical replicate								Replicate	Technical replicate								Replicate	Technical replicate
		Dilution -6		mL	no cm2	Log 10	STDDEV	Error			-6		mL	no cm2	Log 10	STDDEV	Error			Dilution -6		mL	no cm2	Log 10	STDDEV	Error
	1	24		2400000000	4200000000	9.62325	0.339207	0.169603		1	0		0	0	0	4.34901	2.1745		1	1		100000000	175000000	8.24304	0.65547	0.327735
	2	4		400000000	700000000	8.8451				2	9		900000000	1575000000	9.19728				2	31		3100000000	5425000000	9.7344
	3	14		1400000000	2450000000	9.38917				3	1		100000000	175000000	8.24304				3	7		700000000	1225000000	9.08814
	4	17		1700000000	2975000000	9.47349				4	2		200000000	350000000	8.54407				4	18		1800000000	3150000000	9.49831
	Average	14.75		1475000000	2581250000	9.33275				Average	3		300000000	525000000	6.4961				Average	14.25		1425000000	2493750000	9.14097
DPI 15 - 15/08	Plant 1									Plant 2									Plant 3
	Replicate	Technical replicate								Replicate	Technical replicate								Replicate	Technical replicate
		Dilution -3		mL	no cm2	Log 10	STDDEV	Error			Dilution 1:1000		mL	no cm2	Log 10	STDDEV	Error			Dilution 1:1000		mL	no cm2	Log 10	STDDEV	Error
	1	1		100000	175000	5.24304	0.912782	0.456391		1	19		1900000	3325000	6.52179	0.328817	0.164409		1	104		10400000	18200000	7.26007	0.338588	0.169294
	2	53		5300000	9275000	6.96731				2	87		8700000	15225000	7.18256				2	23		2300000	4025000	6.60477
	3	85		8500000	14875000	7.17246				3	78		7800000	13650000	7.13513				3	96		9600000	16800000	7.22531
	4	63		6300000	11025000	7.04238				4	93		9300000	16275000	7.21152				4	30		3000000	5250000	6.72016
	Average	50.5		5050000	8837500	6.6063				Average	69.25		6925000	12118750	7.01275				Average	63.25		6325000	11068750	6.95258

## Sheet: Curve
	ΔmltB2.1-ΔmltB2.2										ΔmltB2.2									WT XccA										ΔmltB2.1																			..
	Log 10					DPI	Average	Error			Log 10					DPI	Average	Error		Log 10					DPI	Average	Error			Log 10					DPI	Average	Error
		Plant 1	Plant 2	Plant 3		0	3.95539	0.664636				Plant 1	Plant 2	Plant 3		0	3.85836	0.0685843			Plant 1	Plant 2	Plant 3		0	4.30811	0.0488032				Plant 1	Plant 2	Plant 3		0	4.82517	0.103878
0	1	4.47349	4.54407	4.19728		1	5.22051	0.172666			1	3.85582	3.8341	4.01389		1	4.62742	0.194307		1	4.62325	4.14613	4.49831		1	4.82811	0.181573			1	5.04238	4.99891	4.56526		1	5.74656	0.0850542
	2	4.94201	4.02119	2.79934		3	7.76294	0.24519			2	3.7344	3.56526	4.02837		3	5.40919	0.746763		2	4.19728	4.32222	4.19728		3	7.73175	0.080935			2	4.81124	4.79934	4.81124		3	7.22817	0.143731
	3	4.54407	4.41913	2.97543		6	10.6997	0.233256			3	3.9058	3.86629	3.8341		6	10.3348	0.5639		3	4.35698	4.14613	4.14613		6	10.5122	0.163199			3	4.9058	5.06911	4.9058		6	8.99443	0.505229
	4	4.58546	3.72016	2.24304		10	10.1798	0.076233			4	3.78711	3.93323	3.94201		10	9.44352	0.358938		4	4.32222	4.54407	4.19728		10	9.92301	0.0783203			4	4.62325	4.89625	4.47349		10	9.04506	0.282319
	Average	4.63626	4.17614	3.05377							Average	3.82078	3.79972	3.95459						Average	4.37493	4.28964	4.25975							Average	4.84567	4.9409	4.68894
	STDDEV	0.209011	0.376981	0.823767							STDDEV	0.0753904	0.161671	0.0887603						STDDEV	0.179186	0.188844	0.160858							STDDEV	0.176036	0.118091	0.203061
	Erro	0.104506	0.18849	0.411883							Erro	0.0458429	0.108147	0.0492735						Erro	0.0352734	0.138913	0.0550707							Error	0.0352734	0.138913	0.0550707
1	1	5.02119	5.44716	5.35698							1	4.41913	4.96731	4.19728						1	4.8341	4.62325	4.87651							1	5.95061	5.72016	5.49831
	2	4.72016	5.35698	4.94201							2	4.28443	4.78711	4.95061						2	4.9058	4.64098	4.86629							2	5.95061	5.44716	5.89625
	3	5.44716	5.70544	5.02119							3	4.41913	4.78711	4.89625						3	4.99891	4.70544	4.95061							3	5.28443	5.91514	6.23867
	4	5.02119	5.32222	5.28443							4	4.38917	4.86629	4.56526						4	4.9834	4.32222	5.22981							4	5.56526	5.65801	5.8341
	Average	5.05242	5.45795	5.15115							Average	4.37796	4.85195	4.65235						Average	4.93055	4.57297	4.9808							Average	5.68773	5.68512	5.86683
	STDDEV	0.298979	0.173189	0.200633							STDDEV	0.0639352	0.0854866	0.347907						STDDEV	0.0761173	0.170857	0.170204							STDDEV	0.324479	0.192783	0.303321
	Erro										Erro									Erro	0.107966	0.0755185	0.107096							Error
3	1	7.47349	7.96731	8.14067							1	5.11227	4.44716	6.48855						1	7.70544	7.64098	7.8451							1	7.56526	7.08814	7.35698
	2	7.38917	7.70544	7.77452							2	6.72189	4.72016	6.5799						2	7.62325	7.70544	7.95904							2	7.19728	7.08814	7.97543
	3	7.02119	7.64098	7.8341							3	4.54407	4.32222	6.24304						3	7.78711	7.58546	8.11227							3	7.24304	7.41913	6.8451
	4	7.78711	8.31492	8.10636							4	5.81358	4.24304	5.6744						4	7.47349	7.89625	7.44716							4	6.24304	7.24304	7.47349
	Average	7.41774	7.90716	7.96391							Average	5.54795	4.43314	6.24647						Average	7.64732	7.70703	7.84089							Average	7.06215	7.20961	7.41275
	STDDEV	0.314965	0.306285	0.186417							STDDEV	0.939201	0.208981	0.407043						STDDEV	0.13381	0.135338	0.2844							STDDEV	0.5701	0.157615	0.46391
	Erro										Erro									Erro										Error
6	1	10.0212	9.72016	10.8112							1	10.641	11.0284	9.8451						1	10.243	10.7202	10.3892							1	8.54407	8.54407	9.14613
	2	10.9673	10.4472	11.056							2	10.0212	10.9834	9.72016						2	10.0881	11.4472	10.5441							2	8.54407	8.8451	9.85582
	3	11.1295	10.3222	11.0139							3	9.94201	11.2021	9.72016						3	10.5441	10.5441	10.8765							3	9.02119	8.24304	9.76155
	4	10.6902	11.1621	11.056							4	9.72016	11.2516	9.94201						4	10.5653	10.243	9.94201							4	9.24304	8.24304	9.94201
	Average	10.7021	10.4129	10.9843							Average	10.0811	11.1164	9.80686						Average	10.3601	10.7386	10.4379							Average	8.83809	8.46881	9.67638
	STDDEV	0.488813	0.59178	0.117037							STDDEV	0.39441	0.130472	0.107643						STDDEV	0.233525	0.5118	0.388128							STDDEV	0.351381	0.288214	0.3611
	Erro										Erro									Erro										Erro
10	1	10.2844	9.72016	10.1461							1	9.24304	10.1621	8.54407						1	9.72016	9.62325	9.52179							1	9.62325		8.24304
	2	10.243	10.0881	9.72016							2	9.02119	9.91514	9.28443						2	10.0212	9.97543	9.8341							2	8.8451	9.19728	9.7344
	3	10.357	10.0212	10.0212							3	8.94201	9.56526	9.60477						3	10.1973	10.2387	10.243							3	9.38917	8.24304	9.08814
	4	10.243	10.5653	10.7482							4	9.08814	10.0755	9.87651						4	9.76155	10.2343	9.70544							4	9.47349	8.54407	9.49831
	Average	10.2819	10.0987	10.1589							Average	9.07359	9.92951	9.32744						Average	9.92505	10.0179	9.82609							Average	9.33275	8.66146	9.14097
	STDDEV	0.0537405	0.349804	0.431618							STDDEV	0.127781	0.263514	0.575588						STDDEV	0.22514	0.290463	0.306085							STDDEV	0.339207	0.487833	0.65547
	Erro										Erro									Erro										Error
15	1	9.08814	8.24304	9.47349							1	8.24304	8.72016	9.08814						1	8.72016	8.54407	9.49831							1	5.24304	6.52179	7.26007
	2	9.14613	8.24304	8.24304							2	8.54407	9.41913	9.02119						2	8.54407	9.14613	8.8451							2	6.96731	7.18256	6.60477
	3	8.8451	8.24304	8.94201							3	8.24304	8.24304	9.35698						3	8.24304	9.32222	8.24304							3	7.17246	7.13513	7.22531
	4	8.8451	0	9.60477							4	8.94201	0	9.72016						4	8.24304	8.24304	8.8451							4	7.04238	7.21152	6.72016
	Average	8.98112	6.18228	9.06582							Average	8.49304	6.59558	9.29662						Average	8.43758	8.81386	8.85789							Average	6.6063	7.01275	6.95258
	STDDEV	0.158833	4.12152	0.618858							STDDEV	0.331249	4.4235	0.317467						STDDEV	0.235856	0.505785	0.512676							STDDEV	0.912782	0.328817	0.338588
	Erro										Erro									Erro										Error	0.401894	0.346285	0.21025
