# Supplementary material for: Transposons and pathogenicity in Xanthomonas: acquisition of murein lytic transglycosylases by TnXax1 enhances Xanthomonas citri subsp. citri 306 virulence and fitness
Source: PeerJ. 2018 Dec 19;6:e6111. doi: 10.7717/peerj.6111 (PMC6304161; doi:10.7717/peerj.6111)
Supplement: Supplemental Information 11 [file peerj-06-6111-s011.xlsx]

## Sheet: Plan1
			SB Medium							NB medium
			XccA	Biological replicate	OD 600 nm (after 24 hours)	-8	LOG	Total CFU/mL		XccA	Biological replicate	OD 600nm	-8	LOG	Total CFU/mL
MEDIA				1	1.241	2589	12.7142	5178000000000			1	1.124	1352	12.432	2704000000000
Composition				2	1.166	1537	12.4877	3074000000000			2	1.135	1829	12.5632	3658000000000
SB	5 g/L peptone			3	1.02	1579	12.4994	3158000000000			3	1.173	1371	12.4381	2742000000000
	5 g/L yeast extract			4	1.189	883	12.247	1766000000000				Average	1517.33	12.4821	3.03467e+12
	1 g/L glutamic acid				Average	1647	12.5177	3294000000000				STDDEV	220.518	0.0604878	4.41036e+11
	5 g/L sucrose				STDDEV	609.874	0.165349	1.21975e+12			STDDEV
Composition			ΔmltB2.1	Biological replicate	OD 600 nm (after 24 hours)	-8		Total CFU/mL		ΔmltB2.1	Biological replicate	OD 600nm	-8		Total CFU/mL
NB	3 g/L beef extract			1	0.792	388	11.8899	776000000000			1	0.949	791	12.1992	1582000000000
	5 g/L yest extract			2	0.865	384	11.8854	768000000000			2	0.821	419	11.9232	838000000000
				3	1.014	220	11.6435	440000000000			3	0.747	1252	12.0828	1210000000000
				4	0.97	402	11.9053	804000000000				Average	820.667	12.0828	1210000000000
					Average	348.5	11.8432	697000000000				STDDEV	340.717	0.113119	3.03737e+11
					STDDEV	74.4899	0.108522	1.4898e+11
			ΔmltB2.2	Biological replicate	OD 600 nm (after 24 hours)	-8		Total CFU/mL		ΔmltB2.2	Biological replicate	OD 600nm	-8		Total CFU/mL
				1	1.045	195	11.5911	390000000000			1	1.154	367	11.8657	734000000000
				2	0.982	400	11.9031	800000000000			2	1.241	125	11.3979	250000000000
				3	1.025	438	11.9425	876000000000			3	1.241	252	11.7024	504000000000
				4	1.003	482	11.9841	964000000000				Average	248	11.6955	496000000000
					Average	378.75	11.8794	757500000000				STEDDEV	98.8366	0.19384	496000000000
					STDDEV	109.985	0.155155	2.1997e+11							1.97673e+11
			ΔmltB2.1-ΔmltB2.2	Biological replicate	OD 600 nm (after 24 hours)	-8		Total CFU/mL		ΔmltB2.1-ΔmltB2.2	Biological replicate	OD 600nm	-8		Total CFU/mL
				1	1.003	79	11.1987	158000000000			1	1.085	84	11.2253	168000000000
				2	0.918	149	11.4742	298000000000			2	1.159	64	11.1072	128000000000
				3	1.067	305	11.7853	610000000000			3	1.101	28	10.7482	56000000000
				4	0.923	291	11.7649	582000000000				Average	58.6667	11.0694	1.17333e+11
					Average	206	11.6149	412000000000				STDDEV	23.1709	0.202893	4.63417e+10
					STDDEV	95.3992	0.240116	1.90798e+11
