# Supplementary material for: Transposons and pathogenicity in Xanthomonas: acquisition of murein lytic transglycosylases by TnXax1 enhances Xanthomonas citri subsp. citri 306 virulence and fitness
Source: PeerJ. 2018 Dec 19;6:e6111. doi: 10.7717/peerj.6111 (PMC6304161; doi:10.7717/peerj.6111)
Supplement: Supplemental Information 12 [file peerj-06-6111-s012.xlsx]

## Sheet: 0.7 swarming 
0.7	48 hours																																						0.7	72 hours
	ΔmltB2.1-ΔmltB2.2									ΔmltB2.1									ΔmltB2.2									XccA												ΔmltB2.1-ΔmltB2.2
	Biological replicate	Technical replicate	Area (cm)	Mean	Min	Max	Angle	Lenght		Biological replicate	Technical replicate	Area (cm)	Mean	Min	Max				Biological replicate	Technical replicate	Area (cm)	Mean	Min	Max	Angle	Lenght		Biological replicate	Technical replicate	Area (cm)	Mean	Min	Max	Angle	Lenght					Biological replicate	Technical replicate	Area (cm)	Mean	Min	Max	Angle	Lenght
	1	1	2.38	149694	135000	207	-90000	9000		1	1	3.235	123926	101	169	-90	9		1	1	3.111	126214	110	158	-90	9		1	1	2.61	155091	136	224	-90	9					1	1	2.312	155946	137	233	-90	9
		1	2.61	140576	0	177	0	9000			1	3.675	115667	96	148	0	9			1	2.996	126828	117	160	0	9			1	3.235	144778	136	175	0	9						1	2.61	151788	138	220	0	9
		1	2.603	140542	21501	187	-45000	9000			1	3.04	121855	108820	167	66251	9			1	2.747	132570	117200	212	55784	9			1	2.992	146036	135408	187	55176	9						1	2.821	148724	136956	158991	50440	9
		1	2.608	139798	9094	179	38660	9000			1	3.133	122280	101593	169	-48013	9			1	3.141	125565	116748	154	-45000	9			1	3.138	143193	132964	168	-37304	9						1	2.224	157888	134473	235000	-36254	9
		2	2.452	148257	129000	200	-90000	9000			2	2.996	128379	91000	188	-90000	9			2	2.889	130600	117000	188	-90000	9			2	2.312	151568	139000	220	-90000	9						2	2.889	145200	133000	156000	-90000	9
		2	2.529	146824	135000	193	0	9000			2	2.697	129844	90000	228	0	9			2	2.697	137594	118000	218	0	9			2	2.188	154385	139000	220	0	9						2	2.311	152025	134111	213000	1591	9
		2	2.686	146028	138565	176	56821	9000			2	2.962	133245	95041	226	73496	9			2	3.174	130048	120195	183	49635	9			2	2.538	150226	137135	218	56310	9						2	2.755	146031	135827	167000	70974	9
		2	2.703	143427	135000	168	-48991	9000			2	2.96	134205	95121	226	-29249	9			2	2.781	138850	120902	218	148392	9			2	2.509	148434	139000	213	-67249	9000						2	2.703	145715	137156	156344	-48991	9
		3	2.452	151343	140000	188	-90000	9000			3	2.452	126000	102000	210	-90000	9			3	2.697	137438	122000	209	-90000	9			3	2.529	152294	134000	229	-90000	9000						3	2.311	149291	135167	201000	-88409	9
		3	2.529	149824	140000	179	0	9000			3	2.529	132412	97000	208	0	9			3	2.79	134968	126000	185	0	9			3	2.697	142656	130000	192	0	9000						3	2.312	149108	133000	201000	0	9
		3	2.583	149127	140510	181	49970	9000			3	2.433	129958	103062	228	58173	9			3	2.565	138468	124476	221	73811	9			3	2.907	141988	135046	151	50711	9000						3	2.694	144262	133320	152150	69228	9
		3	2.297	152944	143000	208	-41634	9000			3	2.84	118312	101000	164	-42274	9			3	2.921	133405	125335	173	-33690	9			3	2.629	146026	131378	217	-52765	9000						3	2.267	149203	133877	207000	-31504	9
		4	2.61	147667	123000	170	-90000	9000			4	2.697	124531	104000	202	-90000	9			4	2.61	135818	120000	221	0	9			4	2.79	142194	134000	167	-90000	9000						4	2.186	160008	142632	224000	-88493	9
		4	2.529	151471	137000	194	0	9000			4	2.697	124031	106000	226	0	9			4	2.697	134719	120000	214	-90000	9			4	2.697	150094	136000	226	0	9000						4	2.373	157052	139829	218000	-3270	9
		4	2.509	147647	127824	189	59621	9000			4	2.992	124168	106250	193	55176	9			4	3.071	128540	121982	158	49399	9			4	2.598	148482	134358	228	79380	9000						4	2.423	154324	135467	224000	37875	9000
		4	2.318	149071	128453	193	-49574	9000			4	2.629	126845	103979	218	-37235	9			4	2.821	131223	120170	188	-50440	9			4	2.384	152049	132647	229735	-60461	9000						4	2.305	156446	139741	219000	-33690	9000
	Average		2.52488							Average		2.87294							Average		2.85675							Average		2.67206										Average		2.4685
	2	1	2.529	149382	139	181	-90	9		2	1	2.61	148545	140000	181	-90000	9		2	1	2.529	138265	126	166	-90	9		2	1	2.79	143968	123000	186	-90000	9000					2	1	2.247	153333	138162	209	-88452	9
		1	2.529	149176	133	179	0	9			1	2.312	152622	140000	196	0	9			1	2.38	140750	127	210	0	9			1	2.79	136484	114000	163	0	9000						1	2.188	156538	139000	215	0	9
		1	2.426	151741	136367	204	56768	9000			1	2.527	150147	142468	182	54866	9			1	2.433	141928	129623	209	58173	9			1	3.193	138880	116462	167	46548	9000						1	2.357	150885	140287	199	75174	9
		1	2.686	148046	136189	176	-33179	9000			1	2.52	150765	140948	203	-26565	9			1	2.786	134177	126099	157	-40815	9			1	2.786	134677	108000	197	-23962	9000						1	2.42	151855	142582	193	-41496	9000
		2	2.697	149469	137000	165	-90000	9000			2	2.452	147257	130000	205	-90000	9			2	2.697	139312	126000	206	-90000	9			2	2.79	138613	116000	202	-90000	9000						2	2.452	159229	147000	208	-90000	9000
		2	2.312	154189	142000	205	0	9000			2	2.889	142600	130000	164	0	9			2	2.452	141800	127000	210	0	9			2	2.697	143625	124000	176	0	9000						2	2.188	165692	144000	228	0	9000
		2	2.673	148575	139031	168	55305	9000			2	2.559	145352	135950	173	52431	9			2	2.686	138493	128558	179	56821	9			2	2.907	133658	116224	186	50711	9000						2	2.559	158274	149091	200	-52431	9000
		2	2.766	147281	134911	157	-38367	9000			2	3.071	144246	136321	156	-40601	9			2	2.88	136409	128360	174	-61699	9			2	2.876	137274	117215	200	-49185	9000						2	2.444	162043	148018	223	67891	9000
		3	2.312	150784	139000	181	-90000	9000			3	2.312	154162	136000	218	-90000	9			3	2.452	143200	126000	209	-90000	9			3	2.378	144137	119000	209	-88363	9000						3	2.38	156083	147000	196	-90000	9000
		3	2.312	151081	138000	180	0	9000			3	2.697	145312	137000	179	0	9			3	2.608	140221	129938	184	-1790	9			3	2.38	144556	117000	213	0	9000						3	2.311	156072	147667	176	-1591	9000
		3	2.527	149611	140317	161	54866	9000			3	2.583	146573	138788	169	49970	9			3	2.596	142422	133256	200	72121	9000			3	2.656	147019	122232	211	50194	9000						3	2.318	156465	150640	180	68499	9000
		3	2.377	150477	141333	177	-32347	9000			3	2.492	148165	136859	200	-46219	9			3	2.608	144289	130000	204996	-38660	9000			3	2.559	138430	116695	205	-52431	9000						3	2.394	155321	149526	170	-35538	9000
		4	2.38	151000	139000	194	-90000	9000			4	3.111	146464	132000	196	-90000	9			4	2.79	145129	130000	212000	-90000	9000			4	2.529	144382	115000	212	-90000	9000						4	2.248	164105	152000	210	-90000	9000
		4	2.312	149027	139000	176	0	9000			4	3.235	143481	134000	174	0	9			4	2.529	146265	131000	205000	0	9000			4	2.79	138742	116000	199	0	9000						4	2.247	162267	149973	197	1548	9000
		4	2.382	150037	140922	181	59036	9000			4	3.138	144605	134325	177	52696	9			4	3.055	140193	134607	157000	64359	9000			4	2.809	136644	118197	187	54689	9000						4	2.318	161447	151907	185	49574	9000
		4	2.466	148777	138639	170	-51072	9000			4	3.133	144111	133923	173	-60524	9			4	2.747	142275	132389	188000	-34216	9000			4	2.672	138816	115880	206	-42397	9000						4	2.134	166255	152568	229	-62103	9000
	Average		2.48037							Average		2.72756							Average		2.63925							Average		2.72512										Average		2.32531
	3	1	2.697	151312	139	187	-90	9		3	1	2.076	158244	140000	204	-90000	9		3	1	2.452	144171	132	195	-90	9		3	1	2.592	153118	134000	206	-90000	9					3	1	2.248	154105	133	204	-90	9
		1	2.79	149419	138	165	0	9			1	2.529	151941	143000	187	0	9			1	2.61	141242	132	172	0	9			1	2.992	145414	133214	187	2045	9						1	2.247	157156	146162	191	-1548	9
		1	2.859	149728	142191	168	59036	9			1	2.461	152390	141844	196	45000	9			1	2.583	145830	133061	212	62650	9			1	3.133	144319	134173	169	41987	9						1	2.223	154704	136000	191763	68199	9
		1	2.809	150490	137262	166	-35311	9			1	2.444	151828	146436	176	-40236	9			1	2.703	139881	133700	160	-48991	9			1	2.318	155382	137600	207	-40426	9						1	2.141	159019	143797	212000	-43958	9
		2	2.697	147219	136000	155	-90000	9			2	2.61	151303	139000	202	-90000	9			2	2.697	144438	133000	198	-90000	9			2	2.529	148353	135000	196	-90000	9						2	2.024	154952	141000	203000	-90000	9
		2	2.312	152622	139000	204	0	9			2	2.697	148531	135000	185	0	9			2	2.889	144533	126000	200	0	9			2	2.188	154821	136000	204	0	9						2	2.074	152199	135700	191000	1432	9
		2	2.57	148695	137188	164	60255	9			2	2.628	152477	143094	188	41186	9			2	2.787	144212	132500	191	60018	9			2	2.929	144904	131375	169	47862	9						2	2.174	151240	140561	190000	73443	9
		2	2.876	148471	139000	168	-49185	9			2	2.452	153801	142000	209	-28072	9			2	2.787	146416	132400	200	-29982	9			2	2.639	147075	135393	181	-46273	9						2	2.277	150340	138011	158961	-45000	9
		3	2.38	150889	139000	167	-90000	9			3	2.79	152710	144000	181	-90000	9			3	2.529	146382	131000	197	-90000	9			3	2.38	150333	133000	206	-90000	9						3	2.024	154524	140000	198000	-90000	9
		3	2.452	151600	138000	166	0	9			3	2.608	153739	145875	195	-1790	9			3	2.886	141075	132138	164	1975	9			3	2.787	147197	133267	202	-1909	9						3	1.974	156047	143000	200000	0	9
		3	2.211	155754	139132	203830	52524	9			3	2.513	154724	145050	201	64983	9			3	2.79	146902	135938	208010	65095	9			3	2.656	147970	136000	201	50194	9						3	1.97	157320	143245	206000	64654	9
		3	2.297	152887	138000	183000	-41634	9			3	2.678	153639	142741	177	-45000	9			3	2.703	142966	133667	186000	-41009	9			3	2.96	145286	137243	197	119249	9						3	2.059	153716	143075	187000	-71114	9000
		4	2.312	149514	137000	166000	-90000	9			4	2.529	151794	144000	189	-90000	9			4	2.697	143188	132000	172000	-90000	9			4	2.38	149194	135000	206	-90000	9						4	2.024	156024	142000	182000	-90000	9000
		4	2.188	154436	140000	206000	0	9			4	2.452	152457	144000	193	0	9			4	2.61	142697	135000	177000	0	9			4	2.61	145788	137000	192	0	9						4	2.023	156359	138000	200000	-1397	9000
		4	2.242	152802	141021	196000	41760	9			4	2.522	152471	143346	196	72646	9			4	2.678	142778	136516	164000	45000	9			4	2.706	147485	138147	205	66801	9						4	1.996	155302	143214	173000	-47911	9000
		4	2.242	151263	141723	172000	-41760	9			4	2.631	152986	145534	201	-30651	9			4	2.583	150453	135000	213000	-49970	9			4	2.672	143234	135783	153	-47603	9						4	1.97	158646	145687	209000	64654	9000
	Average		2.49587							Average		2.53875							Average		2.6865							Average		2.65444										Average		2.0905
	4	1	2.697	144594	132000	189	-90000	9		4	1	2.13	150325	141000	190	-90000	9		4	1	2.79	143032	120	210	-90	9		4	1	2.248	154263	115	206	-90	9					4	1	2.312	157270	140000	207000	-90000	9000
		1	2.889	140733	127000	158	0	9			1	2.248	149632	140000	201	0	9			1	2.996	139517	117	227	0	9			1	2.61	148818	122	200	0	9						1	2.608	153080	145312	159562	-1790	9000
		1	2.889	140552	131530	171	43603	9			1	2.224	149137	139477	187	53746	9			1	3.174	137401	118385	194	49635	9			1	3.065	146307	114936	169	53973	9000						1	2.384	155906	145118	203000	-60461	9000
		1	2.715	142949	132667	199	-27408	9			1	2.043	151698	139778	211	-36027	9			1	3.174	134504	120213	170	-49635	9			1	2.538	147060	124281	189	-33690	9000						1	2.576	155372	144799	201000	66571	9000
		2	2.076	144415	130000	166	-90000	9			2	2.248	149474	136000	200	-90000	9			2	2.889	136567	105000	216	-90000	9			2	2.61	148970	112000	195	-90000	9000						2	2.787	147789	137000	184000	-88091	9000
		2	2.024	144452	130000	176	0	9			2	2.452	145171	136000	174	0	9			2	3.23	131123	102769	207	2203	9			2	2.529	142206	113000	207	0	9000						2	2.886	149143	130966	198000	-1975	9000
		2	2.076	146323	133000	199	53130	9			2	2.433	146002	136490	183	58173	9			2	3.039	132029	109806	227	52306	9			2	2.649	143783	114184	188	61821	9000						2	2.57	152477	140125	212000	60255	9000
		2	1.1996	144598	134000	169	-42089	9			2	2.234	150294	139224	199	-27255	9			2	2.656	134035	107490	223	-50194	9			2	2.171	139289	113905	203	-29055	9000						2	2.511	153938	138706	210130	-36529	9000
		3	2.529	149441	140000	171	-90000	9			3	2.312	148946	134000	206	-90000	9			3	3.111	121393	96000	224	-90000	9			3	2.697	142938	94000	177	-90000	9000						3	2.13	156850	146000	219000	-90000	9000
		3	2.61	150818	143000	189	0	9			3	2.38	150194	139000	204	0	9			3	2.996	128172	95000	233	0	9			3	2.38	159361	120000	208	0	9000						3	2.024	159905	146000	225000	0	9000
		3	2.629	149572	142081	158980	52765	9			3	2.72	145942	137710	176	65095	9			3	2.859	129825	96543	226	67834	9			3	2.88	147676	125120	183	61699	9000						3	2.091	157014	144180	211000	72474	9000
		3	2.329	154684	142649	198000	-47291	9			3	2.608	144934	138352	166	-51340	9			3	2.809	134287	97859	230	-54689	9			3	2.452	148566	112052	205	-61928	9000						3	2.029	157263	147246	210000	-39987	9000
		4	2.61	146364	133000	159000	-90000	9			4	2.529	148912	140000	174	-90000	9			4	2.697	126344	100000	195	-90000	9			4	2.452	147800	127000	200	-90000	9000						4	2.378	158810	143857	215000	-88363	9000
		4	2.61	148970	140000	173000	0	9			4	2.527	150896	141273	189	1736	9			4	2.697	124375	100000	197	0	9			4	2.312	145757	116000	204	0	9000						4	2.248	157711	141000	208000	0	9000
		4	2.706	147287	137000	168000	66801	9			4	2.305	153950	143259	210	70560	9			4	2.931	126638	111396	181	69677	9			4	2.907	142181	124000	159	39289	9000						4	2.333	157121	142041	218000	45000	9000
		4	2.262	152371	139210	217000	-52815	9			4	2.639	150652	144344	186	-46273	9			4	2.889	125697	104644	178	-46397	9			4	2.626	142347	117500	208	-57804	9000						4	2.305	158502	141556	218000	-56310	9000
	Average		2.42816							Average		2.377							Average		2.93356							Average		2.57037										Average		2.38575
	AVERAGE		2.48232							AVERAGE		2.62906							AVERAGE		2.77902							AVERAGE		2.6555										AVERAGE		2.31752
	STDDEV		0.262052							STDDEV		0.312477							STDDEV		0.205593							STDDEV		0.24872										STDDEV		0.232455
		ΔmltB2.1-ΔmltB2.2	SDDEV	ΔmltB2.1	STDDEV	ΔmltB2.2	STDDEV	XccA	STDDEV
	48 hours	2.48232	0.262052	2.62906	0.312477	2.77902	0.205593	2.6555	0.24872
	72 hours	2.31752	0.232455	2.56987	0.382037	2.93959	0.611657	3.36481	0.550442
	96 horus	2.03036	0.229796	1.92475	0.213173	2.05505	0.19943	2.35513	0.216455
[truncated: 56 more columns]

## Sheet: 0.3 SWIMMING
0,7 48 hous																																							0,7 72 hours
	ΔmltB2.1-ΔmltB2.2									ΔmltB2.1									ΔmltB2.2									XccA												ΔmltB2.1-ΔmltB2.2
	Biological replicate	Technical replicate	Area (cm)	Mean	Min	Max	Angle	Lenght		Biological replicate	Technical replicate	Area (cm)	Mean	Min	Max	Angle	Lenght		Biological replicate	Technical replicate	Area (cm)	Mean	Min	Max	Angle	Lenght		Biological replicate	Technical replicate	Area (cm)	Mean	Min	Max	Angle	Lenght					Biological replicate	Technical replicate	Area (cm)	Mean	Min	Max	Angle	Lenght
	1	1	2.248	145447	118	214	-90	9		1	1	1.928	145159	106	223	-90	9		1	1	2.452	143943	115	214	-90	9		1	1	2.13	142975	120	213	-90	9					1	1	3.675	129750	116000	165000	-90000	9000
		1	2.13	149900	123	204	0	9			1	2.188	145590	109	213	0	9			1	2.608	143489	117750	222	-1790	9			2	2.074	142187	116500	204	-1432	9						2	3.51	131120	117042	170125	-2386	9000
		1	2.111	148743	122126	212	-33690	9			1	2.013	144720	109842	221	-41055	9			1	2.84	144705	116400	207	47726	9			3	2.229	139842	119564	210	66194	9						3	3.559	129400	116111	166000	56976	9000
		1	2.39	146927	126000	207	66371	9000			1	2.174	135627	110430	210	73443	9			1	2.628	144177	118766	223	-41186	9			4	2.483	134111	120667	173	-48652	9						4	4.551	123858	115133	141000	-57995	9000
		2	2.13	154150	129000	219	-90000	9000			2	2.452	136400	112000	187	-90000	9			2	2.79	140516	110000	210	-90000	9			5	2.697	135375	115000	221	-90000	9						5	3.364	130325	117160	172000	-87709	9000
		2	2.247	144826	123270	187	1548	9000			2	2.529	139765	106000	201	0.000	9			2	2.992	138483	115750	209	2045	9			6	2.889	133933	120000	218	0.000	9						6	3.37	127654	115000	173000	0.000	9000
		2	1.855	155444	123800	233	-38660	9000			2	2.043	140506	110428	215	-53973	9			2	3.462	132613	113812	150250	60255	9			7	2.731	141517	119592	223189	-54246	9						7	3.456	127530	117547	172000	38290	9000
		2	2.013	151796	124429	229	62819	9000			2	2.283	146702	115667	216	39401	9000			2	2.631	146098	109098	226000	-22479	9			8	2.715	134466	116160	204000	62592	9						8	4.526	122961	116074	136000	-49399	9000
		3	2.312	144838	112000	224	-90000	9000			3	2.188	139282	108000	218	-90000	9000			3	2.79	146387	113000	224000	-90000	9			9	2.608	138557	121750	200000	-91790	9						9	2.996	138034	120000	176000	-90000	9000
		3	2.452	147629	112000	199	0.000	9000			3	2.311	145277	112222	225	-1591	9000			3	3.668	132346	113739	173000	2490	9			10	2.608	142455	122969	226000	-1790	9						10	4.253	126619	119000	139000	0.000	9000
		3	2.364	148197	119284	218	-51843	9000			3	2.332	135813	111778	214	59859	9000			3	3.731	129704	115565	148000	61189	9			11	2.649	138658	122891	202000	61821	9000						11	5.264	125330	121000	130339	32735	9000
		3	2.38	147520	126000	196	36870	9000			3	1.956	154017	119501	234	-53673	9000			3	3.24	140896	116434	224000	-48180	9			12	2.694	137133	119984	197000	-69228	9000						12	4.343	127561	119000	157000	-68749	9000
		4	2.115	151802	118629	215	-42955	9000			4	2.076	150098	110000	221	-90000	9000			4	2.697	144938	119000	218000	-90000	9			13	2.248	146395	119000	225000	-90000	9000						13	4.75	128105	122000	136000	-90000	9000
		4	2.247	153266	124237	205	38418	9000			4	2.45	144057	108265	208	-1685	9000			4	3.111	142036	122000	163000	0.000	9			14	2.529	139471	123000	212000	0.000	9000						14	4.242	128976	118000	170000	2862	9000
		4	1.928	158864	118000	226	0.000	9000			4	2.224	144108	111483	218	53746	9000			4	2.603	147775	125529	218000	45000	9			15	2.642	139596	122305	215000	73301	9000						15	4.285	133369	123000	178000	72474	9000
		4	2.312	152676	127000	216	-90000	9000			4	2.283	144411	110300	222	-60642	9000			4	2.715	148836	127060	219000	-46332	9			16	2.603	138477	123178	199000	-45000	9000						16	4.438	127858	120222	144000	-42879	9000
	Average		2.20213							Average		2.21437							Average		2.93487							Average		2.53306										Average		4.03638
	2	1	2.024	160381	132	221	-90	9		2	1	2.076	164195	147	197	-90	9		2	1	2.889	119500	86	214	-90	9		2	1	2.38	154528	143000	189000	-90000	9000					2	1	3.37	130385	117000	174000	-90000	9000
		1	2.076	156732	132	203	0	9			1	2.188	165667	143	184	0	9			2	2.61	116818	84	215	0	9			2	2.312	155595	140000	202000	0.000	9000						2	3.668	124736	114130	155000	-2490	9000
		1	2.141	156526	132136	204	-46042	9			1	2.136	165892	153137	178436	-41878	9			3	3.349	104534	86462	162	59421	9			3	2.476	157208	142751	209000	55840	9000						3	4.5	121569	117909	126000	71565	9000
		1	2.267	155345	136269	208	58496	9			1	2.136	164498	149941	191000	60803	9			4	3.044	110053	90630	165	-61557	9			4	2.423	153384	139382	196000	-52125	9000						4	3.841	124955	114537	166000	-39472	9000
		2	2.248	150711	133000	194	-90000	9			2	1.799	167830	145000	204000	-90000	9			5	3.111	109464	86000	199	-90000	9			5	2.529	152324	141000	188000	-90000	9000						5	3.675	120958	113000	154000	-90000	9000
		2	2.13	155300	135000	201	0.000	9			2	2.024	163905	142000	185000	0.000	9			6	2.529	124235	84000	211	0.000	9			6	2.45	151766	141912	187000	-1685	9000						6	4.041	120136	112000	141000	0.000	9000
		2	2.14	153662	134163	194	-38660	9			2	1.896	169362	141605	202000	-45000	9			7	3.24	107850	90606	146	64440	9			7	2.476	153251	142356	196000	55840	9000						7	3.841	121059	111847	153000	-39472	9000
		2	2.273	152284	135822	191	47203	9			2	2.063	165918	147239	183000	52001	9			8	2.79	117857	89480	210	-53130	9			8	2.14	158524	140972	204216	-51340	9000						8	4.317	118886	114500	128000	49086	9000
		3	2.13	152275	130000	204	-90000	9			3	2.024	167881	151000	192000	-90000	9			9	2.697	122969	79000	216	-90000	9			9	2.076	157390	140000	211000	-90000	9000						9	3.849	122478	116000	144000	-90000	9000
		3	2.186	150349	126868	187	-1507	9			3	2.076	165220	143000	193000	0.000	9			10	3.111	114429	82000	210	0.000	9			10	1.924	156237	138000	215000	0.000	8325						10	3.516	126880	119000	172000	0.000	9000
		3	2.009	154272	127051	211409	-64058	9			3	2.044	165954	150000	184000	-60255	9			11	3.462	104058	80000	152	60255	9			11	1.823	153398	139928	192000	-62700	7849						11	4.193	122600	114918	136000	-67166	9000
		3	2.242	148399	132662	191000	48240	9			3	1.985	170346	150554	202000	37147	9			12	2.929	118647	90000	207	-42138	9			12	1.823	152046	142975	183000	50826	7836						12	3.636	125231	119375	149000	53616	9000
		4	2.13	154750	137000	205000	-90000	9			4	1.798	170060	149826	207870	-88755	9			13	2.996	112379	77000	221	0.000	9			13	1.974	158872	143000	213000	-90000	8550						13	3.516	128200	115000	169000	-90000	9000
		4	2.188	153256	132000	192000	0.000	9			4	2.13	164925	149000	180000	0.000	9			14	2.886	116207	86241	218	-88025	9			14	1.924	154777	140865	196000	1548	8328						14	4.253	126571	119000	141000	0.000	9000
		4	2.263	152538	129081	197000	-49399	9			4	1.987	166973	153480	203000	-49844	9			15	2.996	110586	79000	181	0.000	9			15	1.873	154112	142198	184000	-51843	8012						15	3.559	130077	122000	173000	56976	9000
		4	2.262	155147	137637	211000	52815	9			4	1.877	165282	147834	205000	45909	9000			16	3.349	109613	86154	161	59421	9			16	1.823	152902	141160	184000	27300	7849						16	3.481	130979	120011	176000	-26565	9000
	Average		2.16931							Average		2.01494							Average		2.99925							Average		2.15163										Average		3.8285
	3	1	1.974	157651	134	215	-90	9		3	1	1.723	176612	151	212	-90	9		3	1	3.37	141615	123	200	-90	9		3	1	2.278	152267	138	189	-90	9900					3	1	3.849	135087	119	175	-90	9
		1	2.024	157071	134	213	0	9			1	1.882	174194	152909	193864	-1302	9			2	3.37	142346	120	209	0	9			2	1.974	147333	139	170	0	8550						2	3.849	133478	123	173	0	9
		1	2.176	154811	133649	192	-58782	9			1	1.812	176494	163067	202000	-48576	9			3	3.37	142136	123547	215	73740	9			3	2.177	151643	139571	197	45	9546						3	4.149	132187	122378	176	57095	9
		1	2.013	156465	130778	202	62819	9			1	1.957	172161	150061	206000	58570	9			4	3.668	135849	123473	167	-55620	9			4	1.873	145703	138086	166	-52815	8190						4	4.193	134577	122873	172	-75964	9
		2	2.248	157474	136000	201	-90000	9			2	1.926	173317	152860	210000	-88668	9			5	3.235	136000	120000	177	-90000	9			5	1.924	151316	138000	188	-90000	8325						5	3.235	137889	118000	176	-90000	9
		2	2.188	153923	125000	187	0.000	9			2	2.076	165780	145000	194000	0.000	9			6	2.996	139138	120000	207	0.000	9			6	1.873	150095	140000	176	1591	8103						6	3.841	130087	119636	172	2603	9
		2	2.297	152959	134667	208	-41634	9			2	2.107	169690	152000	196000	-40914	9			7	3.738	138579	120851	204	52125	9			7	1.974	151746	143227	195	47121	8597						7	3.398	133964	119000	171	-55008	9
		2	2.318	152519	137198	205	68499	9			2	2.195	164140	144217	200276	34114	9			8	2.96	141590	122977	217	-29249	9			8	2.076	152800	140520	194	-39987	9103						8	3.689	130293	120157	166	57724	9
		3	1.928	158523	139000	206	-90000	9			3	1.928	182023	161000	209000	-90000	9			9	2.79	149387	126000	215	-90000	9			9	2.076	157951	138000	205	-90000	9000						9	2.886	138274	116586	171	-91975	9
		3	2.248	153184	137000	187	0.000	9			3	2.024	175690	157000	218000	0.000	9			10	2.79	149581	123000	212	0.000	9			10	2.076	155610	138000	201	0.000	9000						10	3.37	131962	118000	167	0.000	9
		3	2.191	151807	137727	199	-46081	9			3	2.039	175048	161894	203000	-48013	9			11	3.398	141876	127125	163458	55008	9			11	2.076	157994	145400	212	41987	9081						11	3.567	127797	118174	163	-46736	9
		3	2.211	152319	131810	189	37476	9			3	2.044	176703	152680	212000	46005	9000			12	3.107	144316	124383	199000	-38991	9			12	2.025	153242	143444	186	-36573	8685						12	3.689	127461	117426	172	57724	9
		4	1.84	158652	131000	215	-90000	9			4	2.13	177750	155000	195000	-90000	9000			13	3.107	150493	127111	219000	-92121	9			13	1.974	151923	139000	192	-90000	8550						13	3.37	130731	116000	172	-90000	9
		4	2.13	156525	135000	215	0.000	9			4	1.928	174955	152000	204000	0.000	9000			14	2.996	150414	126000	219000	0.000	9			14	2.025	152250	137000	184	0.000	8775						14	4.041	129091	118000	170	0.000	9
		4	2.174	152751	136487	196	-53427	9			4	1.953	178506	161637	217000	57426	9000			15	4.015	141156	129041	156165	68199	9			15	1.974	151457	139089	193	42879	8597						15	3.738	133581	120607	172	-37875	9
		4	2.094	153479	131725	189	61504	9			4	2.155	176775	157000	197019	-49236	9000			16	3.37	143952	130000	158000	-36870	9			16	2.076	155067	140690	202	-63435	9056						16	3.731	128352	117777	163	61189	9
	Average		2.12838							Average		1.99244							Average		3.2675							Average		2.02819										Average		3.66219
	4	1	2.13	146050	117	213	-90	9		4	1	1.686	178685	149857	228	-91169	9		4	1	2.889	110033	89	156	-90	9		4	1	1.62	116156	92	193	-90	6975					4	1	3.111	138536	119	185	-90	9
		1	1.798	157405	120500	219	-1245	9			1	1.799	175872	156000	199	0.000	9			2	2.889	109533	86	191	0	9			2	1.671	124485	92	227	0	7200						2	4.032	129693	117714	153	2726	9
		1	2.006	150977	126176	228	60945	9			1	1.933	178604	158236	217	-43091	9			3	3.133	108691	90222	136	41987	9			3	1.772	126946	88606	225	52125	7696						3	3.593	132825	118057	173	-25463	9
		1	2.176	143267	123172	186	-31218	9			1	1.93	173771	153254	188085	63435	9			4	2.631	116040	93479	217	-59349	9			4	1.519	123857	106610	197	-56310	6490						4	4.373	131095	119800	160	30466	9
		2	2.13	147275	114000	220	-90000	9			2	2.13	161300	147000	206000	-90000	9			5	2.61	109455	85000	224	-90000	9			5	1.62	105184	75677	213	-88152	6979						5	3.37	137769	122000	177	-90000	9
		2	1.686	155691	116449	225	-1169	9			2	1.974	163209	137000	198000	0.000	9			6	2.889	107267	79000	210	0.000	9			6	1.62	115500	74000	220	0.000	6975						6	2.992	138736	116071	176	-177955	9
		2	2.107	144737	111000	189325	-49086	9			2	1.903	167345	149439	214000	-40314	9			7	2.459	112960	82754	235	76373	9000			7	1.519	111774	92279	193	-46397	6525						7	4.438	128063	116983	143	-47121	9000
		2	2.164	145146	120000	185000	47121	9			2	2.094	161659	142359	204000	51116	9			8	2.672	107146	88204	178	-42397	9000			8	1.62	117574	78986	208	60945	6950						8	3.559	134725	119667	179	33024	9000
		3	2.024	151619	121000	211000	-90000	9			3	1.974	166465	133000	218000	-90000	9			9	2.697	111906	84000	213	-90000	9000			9	1.519	113700	86000	218	-90000	6525						9	4.041	136682	118000	182	-90000	9000
		3	1.84	151870	122000	211000	0.000	9			3	1.974	168651	141000	223000	0.000	9			10	2.787	110446	88667	172	1909	9000			10	1.569	123097	72000	242	0.000	6750						10	4.032	128771	114429	166	2726	9000
		3	2.001	153123	131667	204000	44029	9			3	2.094	163189	143691	207000	-38884	9			11	3.055	112973	93995	158	64359	9000			11	1.569	116280	93920	219	53130	6750						11	3.849	132304	117000	181	-90000	9000
		3	1.803	153746	130704	210000	-50356	9			3	2.155	160495	124440	198000	49236	9			12	2.631	108359	86364	189	-30651	9000			12	1.671	121430	89288	232	-57804	7179						12	4.242	126738	114750	155	-2862	9000
		4	1.974	149209	126000	196000	-90000	9			4	1.883	165867	143000	212000	-90000	9			13	2.452	117229	85000	225	-90000	9000			13	1.671	123848	95000	227	-90000	7200						13	3.574	132031	115446	177	-30964	9000
		4	1.928	147523	116000	194000	0.000	9			4	1.799	171255	151000	203000	0.000	9			14	2.61	111303	87000	160	0.000	9000			14	1.519	117143	99207	190	-1975	6529						14	3.802	130440	118816	172	71565	9000
		4	1.971	151049	125364	215000	59931	9			4	1.891	163838	143068	199000	-59931	9			15	2.933	101798	81184	136	57995	9000			15	1.569	121078	101750	198	-72759	6832						15	3.51	138873	121167	182833	-92386	9000
		4	1.928	148530	120819	195000	-50711	9			4	1.749	172440	154141	214000	39036	9			16	2.486	113183	86333	231	-57265	9000			16	1.772	132053	88156	241	64179	7749						16	3.849	133565	119000	175000	0.000	9000
	Average		1.97913							Average		1.9355							Average		2.73894							Average		1.61375										Average		3.77294
	AVERAGE		2.11973							AVERAGE		2.03931							AVERAGE		2.98514							AVERAGE		2.08166										AVERAGE		3.825
	STDDEV		0.158965							STDDEV		0.173647							STDDEV		0.356633							STDDEV		0.377797										STDDEV		0.454889
		ΔmltB2.1-ΔmltB2.2	SDDEV	ΔmltB2.1	STDDEV	ΔmltB2.2	STDDEV	XccA	STDDEV
	48	2.11973	0.158965	2.03931	0.173647	2.98514	0.356633	2.08166	0.377797
	72	3.825	0.454889	3.80998	0.656499	3.12688	0.44345	2.45469	0.527757
	96	1.787	1.89087	1.77003	0.228735	2.34828	0.23722	1.82397	0.329957
[truncated: 56 more columns]
