# Supplementary material for: Transposons and pathogenicity in Xanthomonas: acquisition of murein lytic transglycosylases by TnXax1 enhances Xanthomonas citri subsp. citri 306 virulence and fitness
Source: PeerJ. 2018 Dec 19;6:e6111. doi: 10.7717/peerj.6111 (PMC6304161; doi:10.7717/peerj.6111)
Supplement: Supplemental Information 13 [file peerj-06-6111-s013.xlsx]

## Sheet: Xanthan gum
XccA							ΔmltB2.1							ΔmltB2.1-ΔmltB2.2							ΔmltB2.2
Biomass(mg)	Before	After		In mg (*1000)	mg cell/ml medium		Biomass(mg)	Before	After		In mg (*1000)	mg cell / ml medium		Biomass(mg)	Berofe	After		In mg (*1000)	mg cell / ml medium		Biomass(mg)	Berofe	After		In mg (*1000)	mg cell / ml medium
1	31.4716	31.6279	0.1563	156.3	1.563		1	24.7801	24.8771	0.097	97	0.97		1	49.7233	49.8308	0.1075	107.5	1.075		1	31.4348	31.5772	0.1424	142.4	1.424
2	29.4835	29.6425	0.159	159	1.59		2	22.9348	23.0085	0.0737	73.7	0.737		2	49.9784	50.0714	0.093	93	0.93		2	33.7247	33.8734	0.1487	148.7	1.487
3	35.7631	35.9258	0.1627	162.7	1.627		3	23.2326	23.3204	0.0878	87.8	0.878		3	49.8737	49.9834	0.1097	109.7	1.097		3	45.6337	45.8024	0.1687	168.7	1.687
Average			0.16085	160.85	1.59333		Average			0.0861667	86.1667	0.861667		Average			0.1034	103.4	1.034		Average			0.153267	153.267	1.53267
				STDEV	0.0185						STDEV	0.0958204						STDEV	0.0740855						STDEV	0.11212
Gum (mg)	Before	After		In mg	mg gum/ ml medium			Before	After		In mg (*1000)	mg cell/ml medium		Gum (mg/mL)	Before	After		In mg (*1000)	mg cell / ml medium		Gum (mg/mL)	Berofe	After		In mg (*1000)	mg cell / ml medium
1	0.7602	0.9833	0.2231	223.1	2.231		Gum (mg/mL)	0.7662	0.9559	0.1897	189.7	1.897		1	0.7215	0.9227	0.2012	201.2	2.012		1	0.772	1.145	0.373	373	3.73
2	0.7659	1.0465	0.2806	280.6	2.806		1	0.7214	0.8705	0.1491	149.1	1.491		2	0.7815	0.9565	0.175	175	1.75		2	0.695	0.9718	0.2768	276.8	2.768
3	0.7698	1.0238	0.254	254	2.54		2	0.7496	0.9359	0.1863	186.3	1.863		3	0.7712	0.9523	0.1811	181.1	1.811		3	0.7537	1.1541	0.4004	400.4	4.004
Average			0.2673	267.3	2.673		3			0.175033	175.033	1.75033		Average			0.185767	185.767	1.85767		Average			0.350067	350.067	3.50067
				STDEV	0.133		Average				STDEV	0.183901						STDEV	0.111935						STDEV	0.530012
mg gum/mg bacteria														mg gum/mg bacteria							mg gum/mg bacteria
1	1.42738						mg gum/mg bacteria							1	1.87163						1	2.61938
2	1.76478						1	1.95567						2	1.88172						2	1.86147
3	1.56116						2	2.02307						3	1.65087						3	2.37344
Average	1.66297						3	2.12187						Average	1.8014						Average	2.28476
STDEV	0.101812						Average	2.03353						STDEV	0.106527						STDEV	0.315708
							STDEV	0.0682525
